# Supplementary material for: Impact of fasting status and storage time on plasma Amyloid-β 42 and 40, p-tau181, p-tau231, GFAP and NfL measurements
Source: Research Square preprint supplement (doi:10.21203/rs.3.rs-8107685/v1), 2025-11-28
Supplement: Supplementary file 1 [file 5f39d42d1721ecdd46b2ca52.docx]

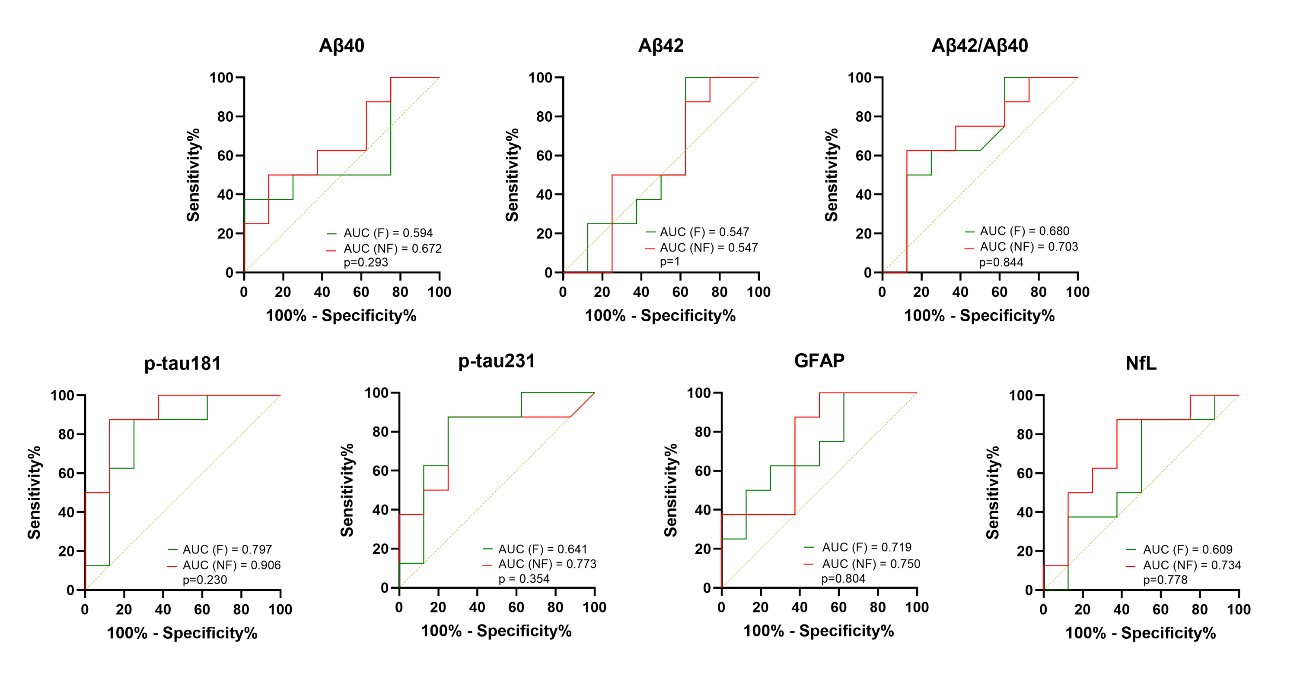
**Suppl. Figure 1.** ROC curves for assessing the predictive capacity of the CSF amyloid cutoff. The p-value indicates the differences in the AUC under both conditions. *p-value below significance threshold of 0.05. F, Fasting; NF, Non-fasting; Aβ, Amyloid Beta; GFAP, glial fibrillary acid protein; NfL, Neurofilament Light Chain.

|  | **Estimate (β)** | **Std. Error** | **p-value** | **R²** | **Partial R²** |
| --- | --- | --- | --- | --- | --- |
| **Aβ40** |  |  |  |  |  |
| Storage time | -0.00904 | 0.01014 | 0.37315 | 0.1390 | 0.1117 |
| Storage time² | 0.00206 | 0.00085 | 0.01545 |
| Age | 0.00518 | 0.00107 | <0.001 |
| Sex | -0.03479 | 0.01138 | 0.00233 |
| *APOE-ε4* | 0.01337 | 0.01164 | 0.25112 |
| **Aβ42** |  |  |  |  |  |
| Storage time | 0.13567 | 0.01889 | <0.001 | 0.0957 | 0.0771 |
| Age | -0.00455 | 0.01123 | 0.684 |
| Sex | -0.11378 | 0.11971 | 0.326 |
| *APOE-ε4* | -0.50532 | 0.12207 | <0.001 |
| **Aβ42/Aβ40** |  |  |  |  |  |
| Storage time | -0.00005 | 0.00015 | 0.7608 | 0.0741 | 0.0002 |
| Age | -0.00049 | 0.00009 | <0.001 |
| Sex | 0.00199 | 0.00096 | 0.0376 |
| *APOE-ε4* | -0.00606 | 0.00097 | <0.001 |
| **p-tau181** |  |  |  |  |  |
| Storage time | -0.01276 | 0.00409 | 0.00191 | 0.1021 | 0.0566 |
| Storage time² | 0.00146 | 0.00036 | <0.001 |
| Age | 0.00239 | 0.00045 | <0.001 |
| Sex | 0.01011 | 0.00485 | 0.03733 |
| *APOE-ε4* | 0.00777 | 0.00496 | 0.11757 |
| **p-tau231** |  |  |  |  |  |
| Storage time | -0.08551 | 0.02180 | <0.001 | 0.0799 | 0.0299 |
| Storage time² | 0.00631 | 0.00152 | <0.001 |
| Age | 0.00999 | 0.00193 | <0.001 |
| Sex | 0.00509 | 0.02060 | 0.805 |
| *APOE-ε4* | 0.09172 | 0.02108 | <0.001 |
| **GFAP** |  |  |  |  |  |
| Storage time | -0.12153 | 0.03030 | <0.001 | 0.2211 | 0.0365 |
| Storage time² | 0.00880 | 0.00254 | <0.001 |
| Age | 0.03761 | 0.00318 | < 0.001 |
| Sex | -0.19480 | 0.03388 | <0.001 |
| *APOE-ε4* | 0.10222 | 0.03464 | 0.00329 |
| **NfL** |  |  |  |  |  |
| Storage time | 0.00095 | 0.00078 | 0.2199 | 0.1665 | 0.0024 |
| Age | 0.00514 | 0.00046 | <0.001 |
| Sex | -0.00888 | 0.00492 | 0.0717 |
| *APOE-ε4* | 0.00899 | 0.00502 | 0.0739 |

**Suppl. Table 1.** Regression model of the storage time effect on the biomarker’s concentration with samples stored up to 10 years. The model is corrected by age, sex and *APOE-ε4* carriership. The partial R2 indicates the variability explained by the storage time. *p-value below significance threshold of 0.05. Aβ, Amyloid Beta; GFAP, glial fibrillary acid protein; NfL, Neurofilament Light Chain.

|  | **SAMPLES INFORMATION** |
| --- | --- |
| Sample size | 412 |
| Age, y (range) | 63.0 (50.6 - 73.4) |
| Gender, F (%) | 65.8 |
| *APOE-ε4*, carrier (%) | 36.9 |
| Plasma Aβ40, pg/mL | 103.81 ± 19.42 |
| Plasma Aβ42, pg/mL | 6.17 ± 1.33 |
| Plasma Aβ42/Aβ40 | 0.06 ± 0.01 |
| Plasma p-tau181, pg/mL | 19.98 ± 6.74 |
| Plasma p-tau231, pg/mL | 2.23 ± 0.85 |
| Plasma GFAP, pg/mL | 98.64 ± 50.28 |
| Plasma NfL, pg/mL | 15.32 ± 6.84 |
| Storage time N4PE, mean years (range) | 3.55 (0.69-6.27) |
| Storage time p-tau181, mean years (range) | 3.21 (0.41-5.88) |
| Storage time p-tau231, mean years (range) | 4.79 (1.96-7.51) |

**Suppl. Table 2**. Demographic table of participants included in the storage time study with samples stored up to 6.5 years. Plasma biomarker concentrations are expressed as mean±SD. Aβ, Amyloid Beta; GFAP, glial fibrillary acid protein; NfL, Neurofilament Light Chain.


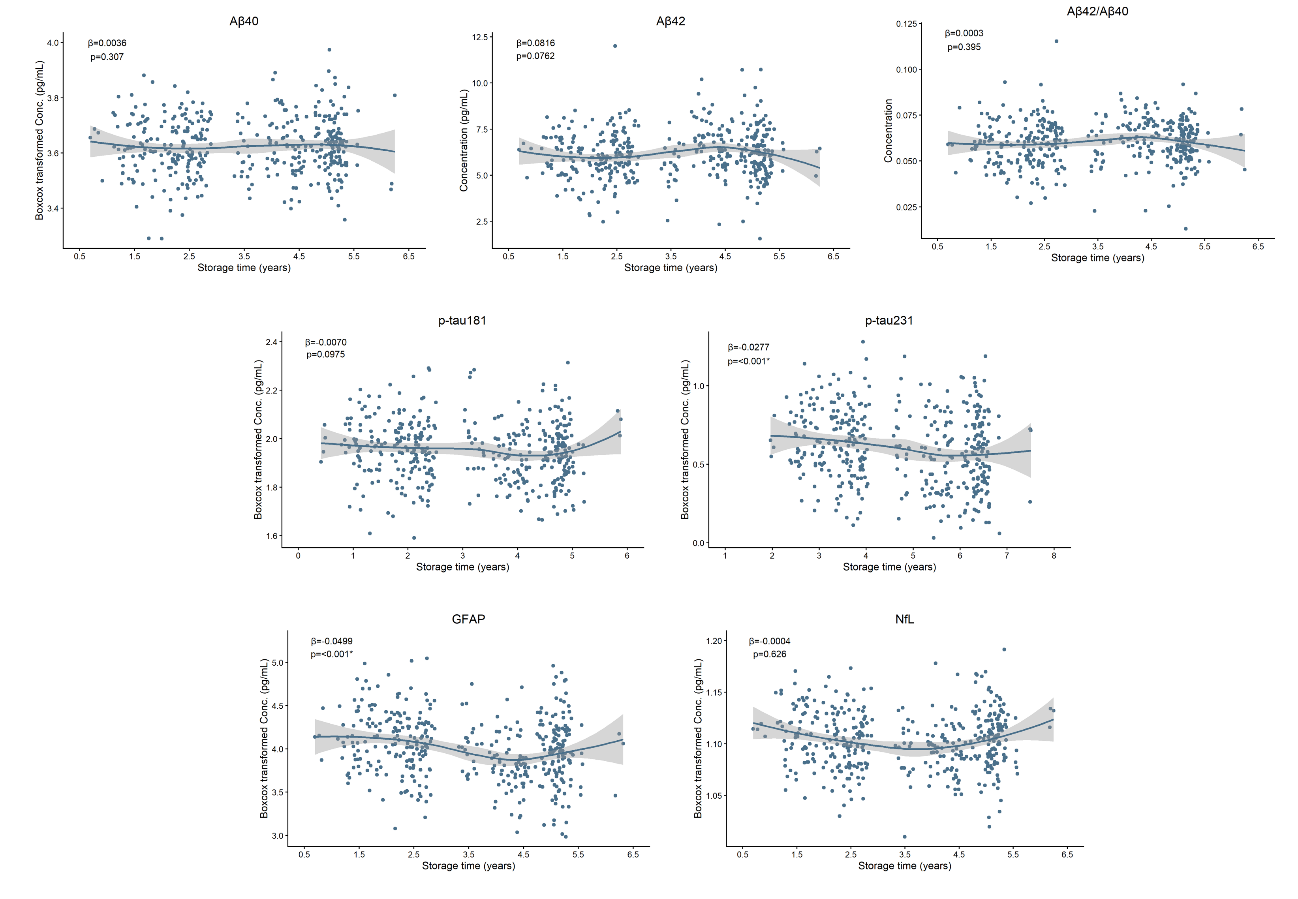


**Suppl. Figure 2.** Scatterplot of the relationship between the storage time (up to 6 .5 years) and the biomarkers concentration. Depicted curves are fitted with a Loess. Regression models were performed and corrected by age, sex and *APOE-ε4* carriership. The *β*s and p-values correspond to the model corrected. *p-value below significance threshold of 0.05. Aβ, Amyloid Beta; GFAP, glial fibrillary acid protein; NfL, Neurofilament Light Chain.

|  | **Estimate (β)** | **Std. Error** | **p-value** | **R²** | **Partial R²** |
| --- | --- | --- | --- | --- | --- |
| **Aβ40** |  |  |  |  |  |
| Storage time | 0.00358 | 0.00350 | 0.30715 | 0.04942 | 0.00256 |
| Age | 0.00413 | 0.00097 | <0.001 |
| Sex | -0.03292 | 0.01052 | 0.00188 |
| *APOE-ε4* | 0.02261 | 0.01086 | 0.03791 |
| **Aβ42** |  |  |  |  |  |
| Storage time | 0.08160 | 0.04590 | 0.07617 | 0.01903 | 0.00771 |
| Age | -0.00825 | 0.012730 | 0.51729 |
| Sex | -0.10639 | 0.138110 | 0.44155 |
| *APOE-ε4* | -0.38462 | 0.142480 | 0.00724 |
| **Aβ42/Aβ40** |  |  |  |  |  |
| Storage time | 0.00034 | 0.0003972 | 0.39540 | 0.08484 | 0.00178 |
| Age | -0.00055 | 0.0001102 | <0.001 |
| Sex | 0.00274 | 0.0011952 | 0.02250 |
| *APOE-ε4* | -0.00632 | 0.0012331 | <0.001 |
| **p-tau181** |  |  |  |  |  |
| Storage time | -0.007031 | 0.004234 | 0.0975 | 0.04450 | 0.00673 |
| Age | 0.004775 | 0.001168 | <0.001 |
| Sex | 0.009217 | 0.012669 | 0.4673 |
| *APOE-ε4* | 0.029086 | 0.013072 | 0.0266 |
| **p-tau231** |  |  |  |  |  |
| Storage time | -0.02769 | 0.00785 | 0.00046 | 0.06662 | 0.02971 |
| Age | 0.00819 | 0.00221 | 0.00024 |
| Sex | -0.01663 | 0.02399 | 0.48857 |
| *APOE-ε4* | 0.08283 | 0.02476 | 0.00090 |
| **GFAP** |  |  |  |  |  |
| Storage time | -0.04992 | 0.01109 | <0.001 | 0.2694 | 0.0474 |
| Age | 0.03435 | 0.00307 | <0.001 |
| Sex | -0.13527 | 0.03332 | <0.001 |
| *APOE-ε4* | 0.10867 | 0.03438 | 0.00169 |
| **NfL** |  |  |  |  |  |
| Storage time | -0.00043 | 0.00089 | 0.6259 | 0.18680 | 0.00058 |
| Age | 0.00240 | 0.00025 | <0.001 |
| Sex | -0.00596 | 0.00267 | 0.0261 |
| *APOE-ε4* | 0.00535 | 0.00275 | 0.0527 |

**Suppl. Table 3.** Regression model of the storage time effect on the biomarker’s concentration with samples stored up to 6.5 years. The model is corrected by age, sex and *APOE-ε4* carriership. The partial R2 indicates the variability explained by the storage time. *p-value below significance threshold of 0.05. Aβ, Amyloid Beta; GFAP, glial fibrillary acid protein; NfL, Neurofilament Light Chain.
